# Supplementary material for: hsa_circ_0058357 acts as a ceRNA to promote non-small cell lung cancer progression via the hsa-miR-24-3p/AVL9 axis
Source: PubMed Central journal article supplement — Mol Med Rep. 2021 Apr 20;23(6):470. doi: 10.3892/mmr.2021.12109 (PMC8097761; doi:10.3892/mmr.2021.12109), 2021-04-20
Supplement: Supplementary_Data.pdf [file Supplementary_Data.pdf]

Figure S1. Verification of the inhibition effectiveness of circ\_0058357 siRNAs in A549 cells. After transfection with siRNA NC and the three circ\_0058357 siRNAs, the relative expression level of circ\_0058357 was detected via reverse transcription-quantitative PCR. \*\* $P < 0.01$ . siRNA, small interfering RNA; NC, negative control; circ, circular RNA.

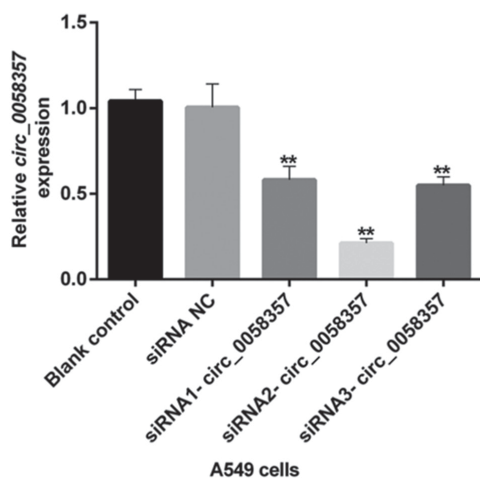

Figure S2. Role of circ\_0058357 knockdown on the body weight of xenograft model mice. A549 cells were transfected with shRNA NC and circ\_0058357 shRNA. Body weight was detected once a week for a consecutive 6 weeks. NC, negative control; circ, circular RNA; shRNA, short hairpin RNA.

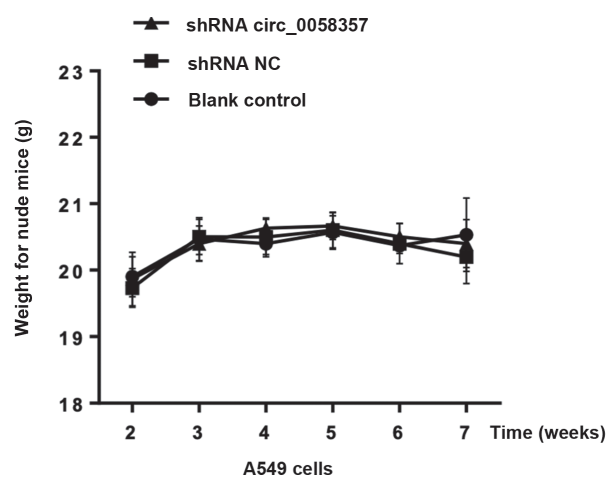

Figure S3. Effects of miR-24-3p mimic on the expression level of circ\_0058357 in NSCLC cells. (A) Binding sites between miR-24-3p and circ\_0058357 were identified. (B) A549 and (C) H1299 cells were transfected with mimic NC and miR-24-3p mimic. Then, the relative expression level of circ\_0058357 was detected via reverse transcription-quantitative PCR. NC, negative control; miR, microRNA; circ, circular RNA.

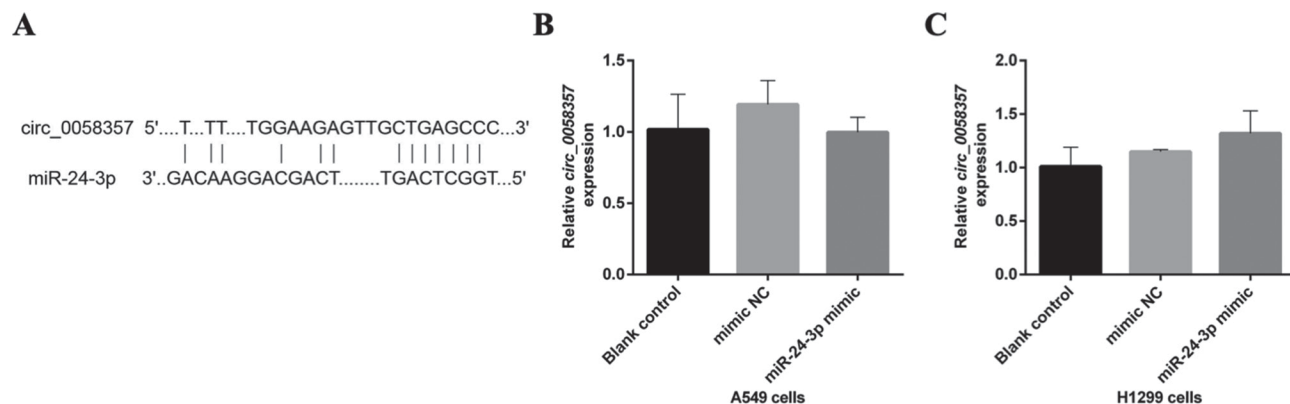

Figure S4. Verification of the upregulation of circ\_0058357 in A549 cells transfected with vector and circ\_0058357 OE plasmids. Relative expression level of circ\_0058357 was detected via reverse transcription-quantitative PCR. \*\* $P < 0.01$ . OE, overexpression; circ, circular RNA; NC, negative control.

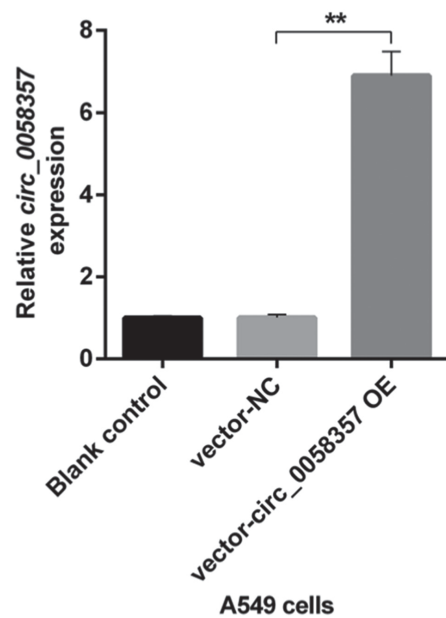

Table SI. Analysis of the binding sites between miR-24-3p and circ\_0058357.

|                     |                                   |
|---------------------|-----------------------------------|
| ClipSeq peakCluster | HHRBL 8845(AGO2 HITS-CLIP BCBL-1) |
| ClipSeq ReadNum     | 1                                 |
| AlignCscore         | 26                                |
